# Supplementary material
Source: PubMed Central journal article supplement (PMC1863490)
Supplement: pnas_0702136104_6.pdf [file pnas_0702136104_6.pdf]

**a**

| <b>Sequence</b>     | <b>M+H</b> | <b>Charge State</b> | <b>Xcorr</b> | <b>(Delta)Cn</b> |
|---------------------|------------|---------------------|--------------|------------------|
| R.VSGQPQSVTASSDK.A  | 1390.68    | 2                   | 3.262        | 0.349            |
| K.IFDDVSSGVSQLASK.V | 1552.79    | 2                   | 3.672        | 0.346            |
| R.DVTTFFSGK.A       | 1001.49    | 2                   | 2.354        | 0.132            |
