# Supplementary material
Source: PubMed Central journal article supplement (PMC1863490)
Supplement: pnas_0702136104_12.pdf [file pnas_0702136104_12.pdf]

| Entry | R <sup>3</sup> | R <sup>2</sup> | R <sup>1</sup> | EC <sub>50</sub> (μM) <sup>a</sup> |
|-------|----------------|----------------|----------------|------------------------------------|
| 1     |                |                |                | 3.1                                |
| 2     |                |                |                | 4.6                                |
| 3     |                |                |                | 0.5                                |
| 4     |                |                |                | > 7.1                              |
| 5     |                |                |                | > 7.1                              |
| 6     |                |                |                | > 7.1                              |
| 7     |                |                |                | > 7.1                              |
| 8     |                |                |                | 1.7                                |
| 9     |                |                |                | 1.5                                |
| 10    |                |                |                | 0.6                                |
| 11    |                |                |                | 0.4                                |
| 12    |                |                |                | > 7.1                              |

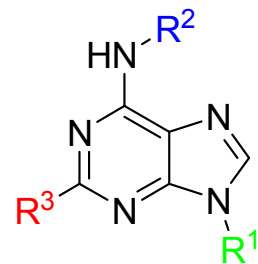

a. The maximum concentration of the analogs that is tested is 7.1 μM.
