# Supplementary material
Source: PubMed Central journal article supplement (PMC1863490)

**a**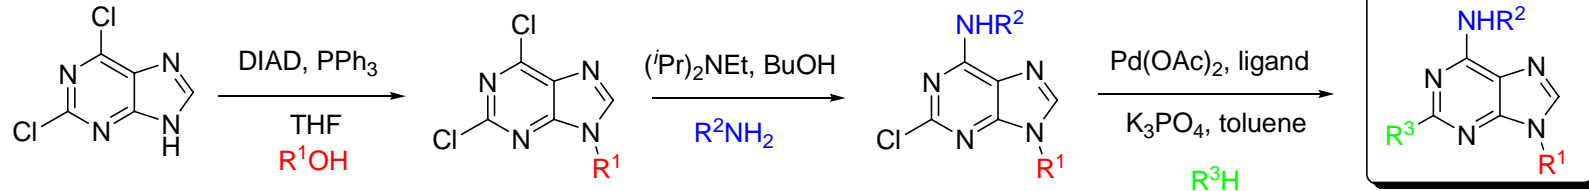

Supplement: pnas_0702136104_1.pdf [file pnas_0702136104_1.pdf]

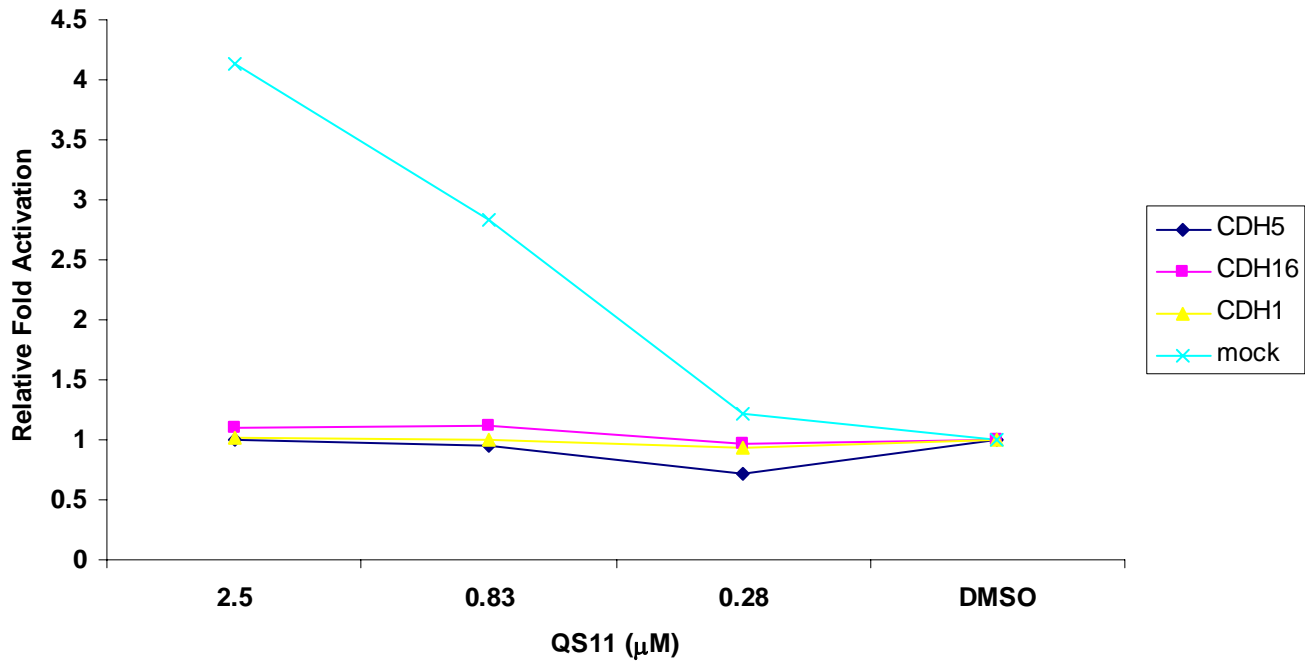

Supplement: pnas_0702136104_10.pdf [file pnas_0702136104_10.pdf]

Fold Activation (QS11/DMSO)

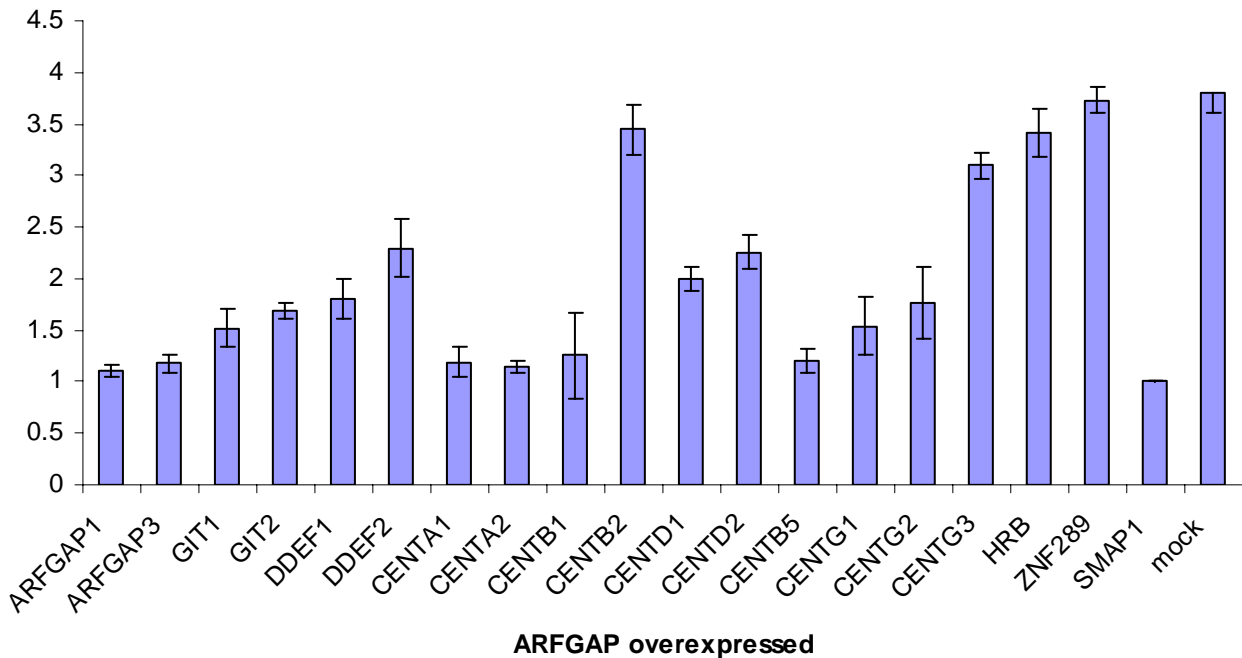

Supplement: pnas_0702136104_11.pdf [file pnas_0702136104_11.pdf]

**b**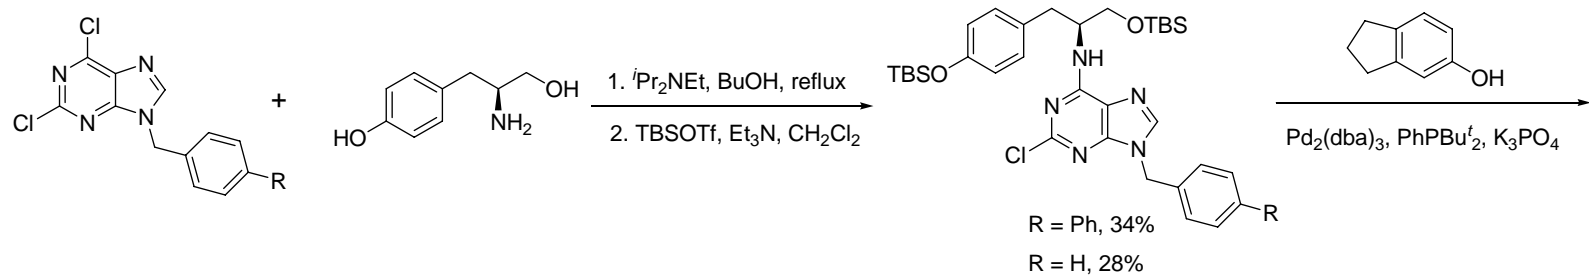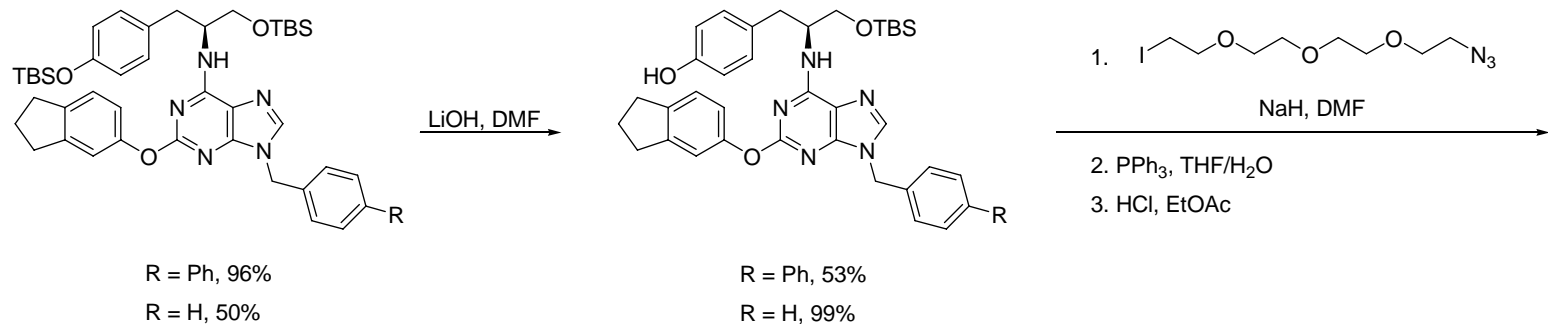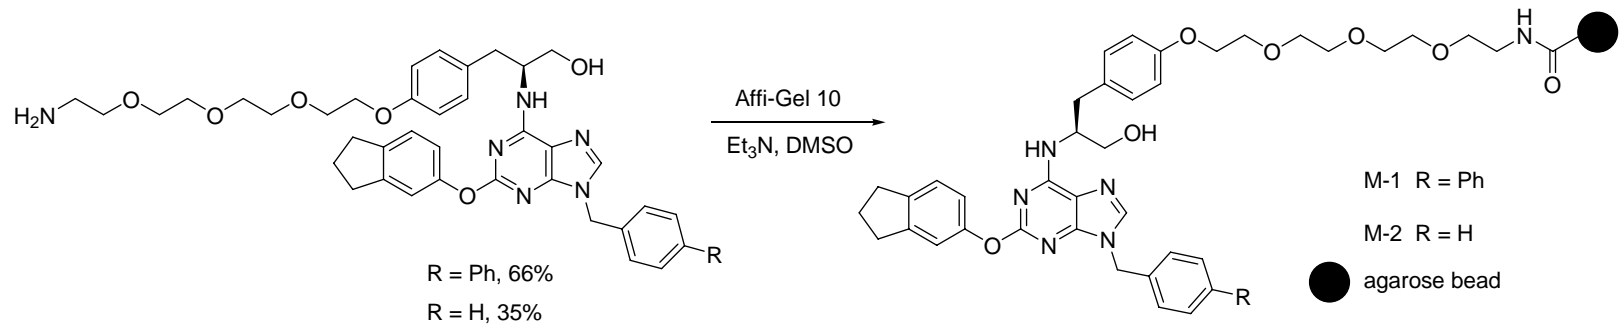

Supplement: pnas_0702136104_2.pdf [file pnas_0702136104_2.pdf]

**a**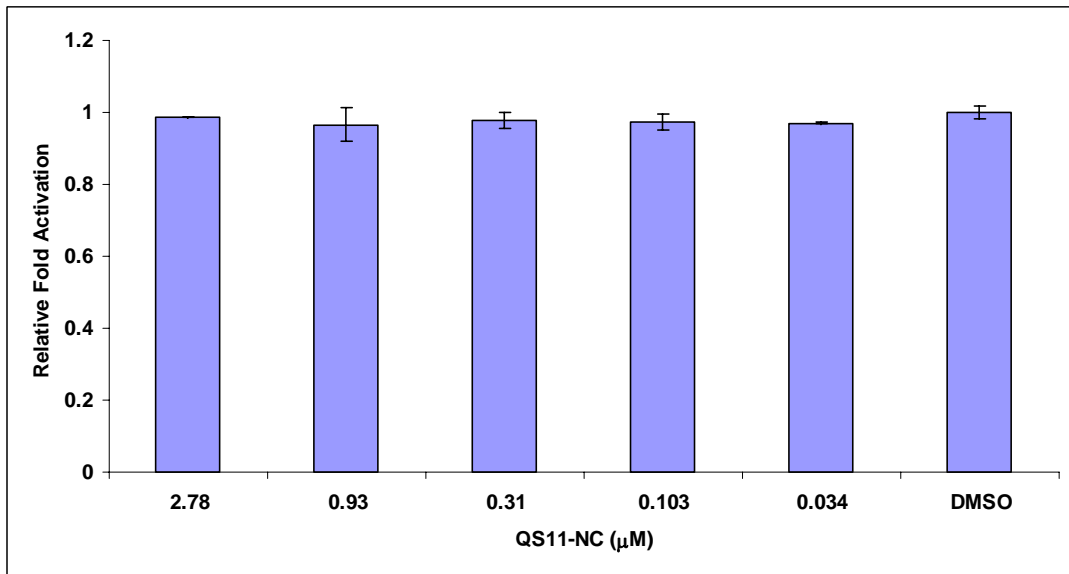

Supplement: pnas_0702136104_3.pdf [file pnas_0702136104_3.pdf]

**b**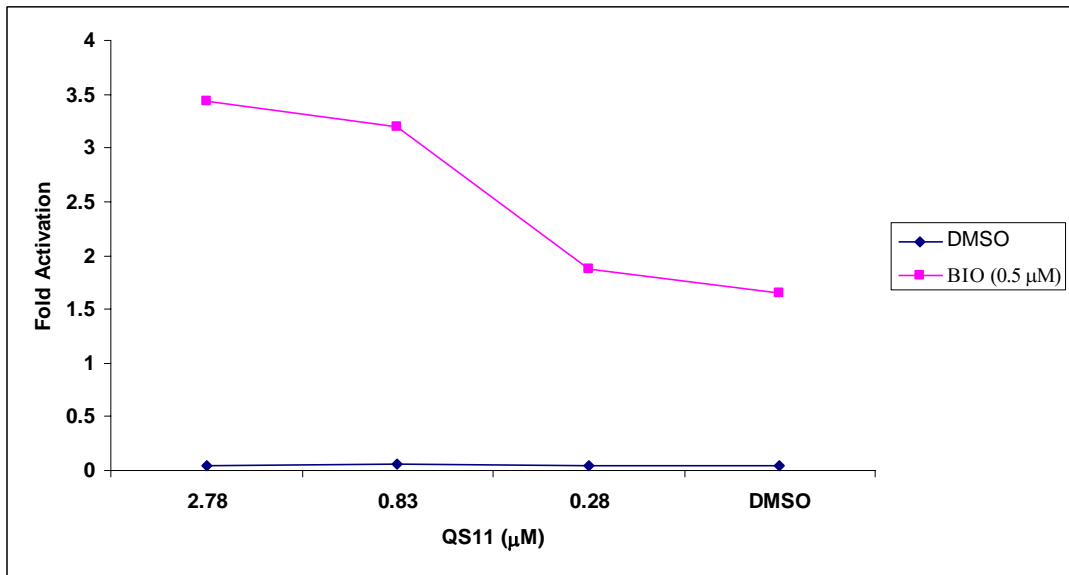

Supplement: pnas_0702136104_4.pdf [file pnas_0702136104_4.pdf]

b

GNFGEL247\_QZ62 #379 RT: 22.01 AV: 1 NL: 3.03E5

T: + c d Full ms2 695.92@35.00 [ 180.00-1405.00]

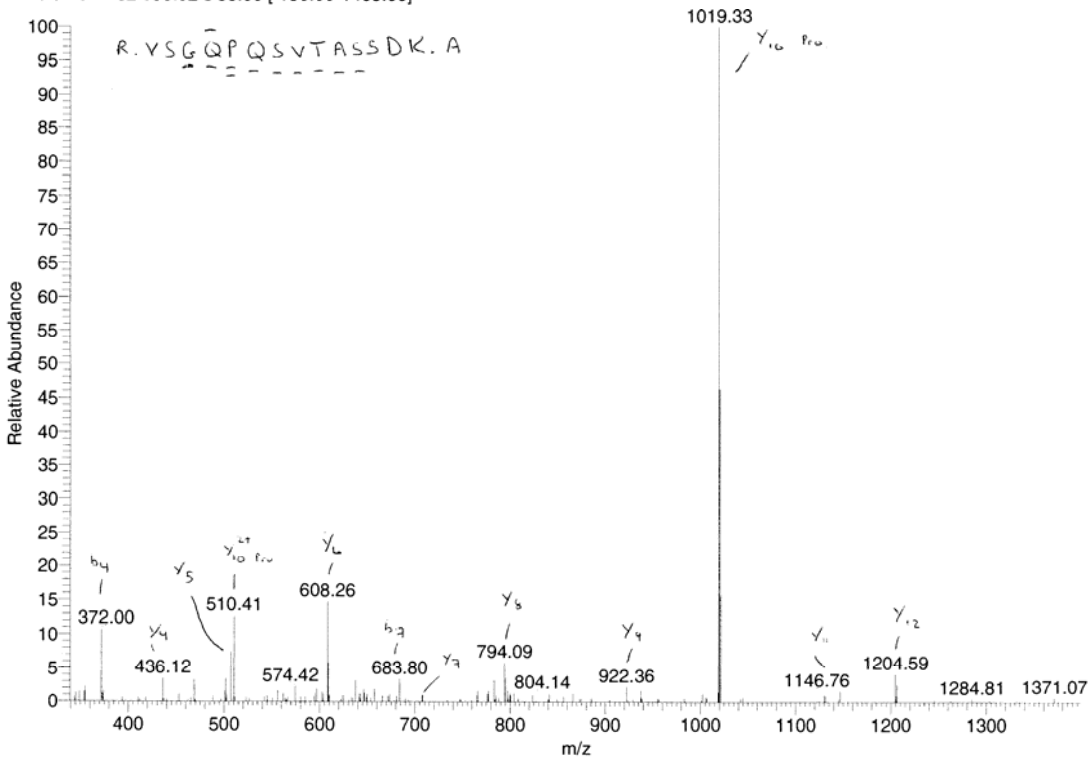

Supplement: pnas_0702136104_7.pdf [file pnas_0702136104_7.pdf]

a

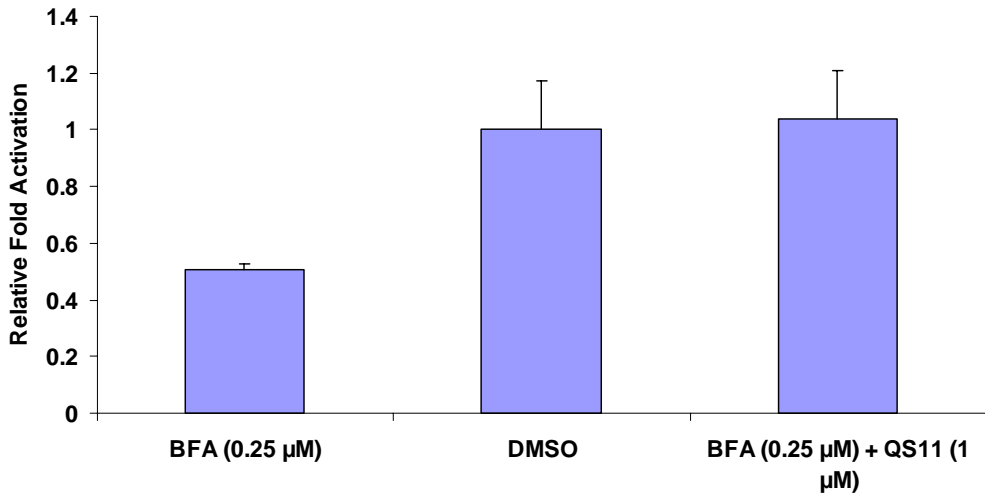

Supplement: pnas_0702136104_8.pdf [file pnas_0702136104_8.pdf]

b

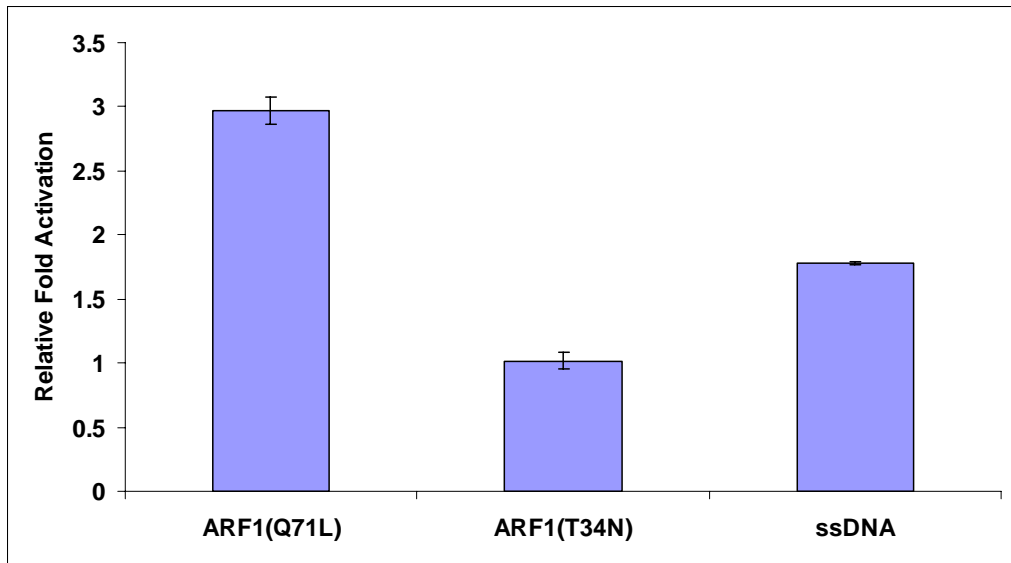

Supplement: pnas_0702136104_9.pdf [file pnas_0702136104_9.pdf]
